# Supplementary material for: Structure and Bonding Patterns in C5H4 Isomers: Pyramidane, Planar Tetracoordinate Carbon, and Spiro Molecules
Source: MDPI journal article supplement (doi:10.3390/atoms11060096), 2023-06-10

# Structure and Bonding Patterns in C<sub>5</sub>H<sub>4</sub> isomers: Pyramidane, Planar Tetracoordinate Carbon, and Spiro molecules

Sayon Satpati<sup>a</sup>, Tarun Roy<sup>a</sup>, Sandip Giri<sup>b</sup>, Anakuthil Anoop<sup>b</sup>, Venkatesan S Thimmakondur<sup>c</sup>, Subhas Ghosal<sup>a,\*</sup>

<sup>a</sup> Department of Chemistry, National Institute of Technology Durgapur, M G Avenue, Durgapur, West Bengal - 713209, India.

<sup>b</sup> Department of Chemistry, Indian Institute of Technology Kharagpur, Kharagpur, West Bengal - 721302, India.

<sup>c</sup> Department of Chemistry and Biochemistry, San Diego State University, San Diego, CA 92182-1030, USA.

E-mail: [subhas.ghosal@ch.nitdgp.ac.in](mailto:subhas.ghosal@ch.nitdgp.ac.in)

## List of Tables:

|                                                                                                                                                                                                                                                                                                                                                                                                                                                                                                                | Page No |
|----------------------------------------------------------------------------------------------------------------------------------------------------------------------------------------------------------------------------------------------------------------------------------------------------------------------------------------------------------------------------------------------------------------------------------------------------------------------------------------------------------------|---------|
| Table S1: Optimized geometries of the C <sub>5</sub> H <sub>4</sub> isomers in singlet ground electronic state in Cartesian coordinates (in Angstrom units) obtained at CCSD(T)/cc-pVTZ level of theory.                                                                                                                                                                                                                                                                                                       | S3      |
| Table S2: Optimized geometries of the C <sub>5</sub> H <sub>4</sub> isomers in triplet ground electronic state and quintet electronic state of <b>ptC-1</b> in Cartesian coordinates (in Angstrom units) obtained at B3LYP/6-311+G(d,p) level of theory.                                                                                                                                                                                                                                                       | S4      |
| Table S3: Dipole moments in different axis (in Debye), total dipole moment (in Debye), Centrifugal distortion constants, and rotational constants (in MHz) of C <sub>5</sub> H <sub>4</sub> isomers in their ground electronic states calculated at the CCSD(T)/cc-pVTZ level of theory.                                                                                                                                                                                                                       | S5      |
| Table S4: The energy gap between singlet and triplet spin state of all nine isomers of C <sub>5</sub> H <sub>4</sub> at B3LYP/6-311+G(d,p) level of theory.                                                                                                                                                                                                                                                                                                                                                    | S6      |
| Table S5: The energy gap between singlet and triplet spin state ( $\Delta E_{st}$ in kcal mol <sup>-1</sup> ), number of imaginary frequencies (N <sub>imag</sub> ), and dipole moment ( $ \mu $ in Debye) of all nine isomers of C <sub>5</sub> H <sub>4</sub> at $\omega$ B97XD/6-311+G(d,p) level of theory.                                                                                                                                                                                                | S6      |
| Table S6: Electron density descriptors (in a.u.) at the (3, -1) bond critical points (BCP) obtained from the B3LYP/6-311+G(d,p) level for all the nine isomers. The topological parameters such as Hamiltonian Kinetic Energy $K(r_c)$ , $\rho(r_c)$ , Laplacian Electron Density ( $\nabla^2\rho(r_c)$ ), Lagrangian Kinetic Energy $G(r_c)$ , Potential Energy Density $V(r_c)$ , Energy Density $E(r_c)$ or $H(r_c)$ , ELF, $G(r_c)/V(r_c)$ , and $G(r_c)/\rho(r_c)$ at the critical points are also given. | S7      |
| Table S7: WBI Indices for all nine isomers calculated at B3LYP/6-311+G(d,p) level of theory.                                                                                                                                                                                                                                                                                                                                                                                                                   | S8      |

## List of Figures:

|                                                                                                                                       |    |
|---------------------------------------------------------------------------------------------------------------------------------------|----|
| Figure S1: Possible 2D structure of initial guess isomers.                                                                            | S9 |
| Figure S2: Optimized geometries of all nine isomers in their triplet spin state calculated at the B3LYP/6-311+G(d,p) level of theory. | S9 |

|                                                                                                                                                                                                                                                   |     |
|---------------------------------------------------------------------------------------------------------------------------------------------------------------------------------------------------------------------------------------------------|-----|
| Figure S3: Energy profile and the structural changes of <b>ptC-1</b> with respect to the change in spin state with the ground state molecular term symbol and number of imaginary frequencies.                                                    | S10 |
| Figure S4: Intrinsic Reaction Coordinate (IRC) for the transition state <b>ptC-3</b> calculated at B3LYP/6-311+G(d,p) level of theory.                                                                                                            | S10 |
| Figure S5: Energy evolution of isomer <b>py-1</b> ( $^1A_1$ ) of $C_5H_4$ obtained from the AIMD simulation carried out at different temperature (10K, 60K and 120K) and 1 atm pressure for 10000 fs at the B3LYP/6-311+G(d,p) level of theory.   | S11 |
| Figure S6: Energy evolution of isomer <b>py-2</b> ( $^1A'$ ) of $C_5H_4$ obtained from the AIMD simulation carried out at different temperature (10K, 60K and 120K) and 1 atm pressure for 10000 fs at the B3LYP/6-311+G(d,p) level of theory.    | S12 |
| Figure S7: Energy evolution of isomer <b>spiro-1</b> ( $^1E$ ) of $C_5H_4$ obtained from the AIMD simulation carried out at different temperature (10K, 60K, and 298K) and 1 atm pressure for 10000 fs at the B3LYP/6-311+G(d,p) level of theory. | S13 |
| Figure S8: Energy evolution of isomer <b>spiro-3</b> ( $^1B$ ) of $C_5H_4$ obtained from the AIMD simulation carried out at different temperature (10K, 60K and 120K) and 1 atm pressure for 10000 fs at the B3LYP/6-311+G(d,p) level of theory.  | S14 |
| Figure S9: Energy evolution of isomer <b>spiro-4</b> ( $^1A'$ ) of $C_5H_4$ obtained from the AIMD simulation carried out at different temperature (10K, 60K and 120K) and 1 atm pressure for 10000 fs at the B3LYP/6-311+G(d,p) level of theory. | S15 |

Table S1: Optimized geometries of the C<sub>5</sub>H<sub>4</sub> isomers in singlet ground electronic state in Cartesian coordinates (in Angstrom units) obtained at CCSD(T)/cc-pVTZ level of theory:

| py-1    |              |              |              | py-2    |              |              |              |
|---------|--------------|--------------|--------------|---------|--------------|--------------|--------------|
| C       | 0.000356681  | -0.004248912 | -1.049041058 | C       | -1.163495180 | -0.127721035 | 0.197087399  |
| C       | -0.085440477 | 1.024427177  | 0.251312710  | C       | 0.047321236  | -1.014789595 | 0.250938138  |
| C       | 1.023348862  | 0.086363875  | 0.253305893  | C       | 1.011900980  | 0.113275068  | 0.328882708  |
| C       | 0.085278607  | -1.022429459 | 0.255295288  | C       | 0.094601133  | 0.009182151  | -0.902977469 |
| C       | -1.023523295 | -0.084355531 | 0.253302078  | C       | -0.177311791 | 0.999367623  | 0.249646448  |
| H       | -0.173988082 | 2.085988114  | 0.102582438  | H       | -0.273712603 | 2.063337771  | 0.097620634  |
| H       | 2.085206773  | 0.174650474  | 0.106635756  | H       | 0.224330767  | 0.023155569  | -1.966582294 |
| H       | 0.173873425  | -2.084536183 | 0.110703748  | H       | 2.087163977  | 0.233735972  | 0.296799781  |
| H       | -2.085334834 | -0.173210810 | 0.106641196  | H       | 0.188599893  | -2.073927148 | 0.100749019  |
| ptC-1   |              |              |              | ptC-2   |              |              |              |
| C       | 1.371675992  | -0.679675925 | 0.003506207  | C       | -1.232294086 | 0.743993758  | 0.000000000  |
| C       | -0.000714839 | -0.000293963 | -0.027737349 | C       | 0.091724124  | -0.000320988 | 0.000000000  |
| C       | -1.372823931 | 0.679656547  | 0.003512287  | C       | 1.427355472  | -0.676024444 | 0.000000000  |
| C       | -1.368950306 | -0.680756712 | 0.003479213  | C       | 1.430777455  | 0.675152545  | 0.000000000  |
| C       | 1.370705248  | 0.681046955  | 0.003473096  | C       | -1.232896697 | -0.742941844 | 0.000000000  |
| H       | 2.106231286  | 1.497984690  | 0.040928987  | H       | -1.442673486 | 1.283737237  | -0.914676726 |
| H       | 2.108366892  | -1.495561551 | 0.041001833  | H       | -1.442745597 | -1.282897936 | -0.914683277 |
| H       | -2.109176565 | 1.495848344  | 0.040989202  | H       | -1.442745597 | -1.282897936 | 0.914683277  |
| H       | -2.104137639 | -1.497996480 | 0.040995885  | H       | -1.442673486 | 1.283737237  | 0.914676726  |
| ptC-3   |              |              |              | spiro-1 |              |              |              |
| C       | -1.548117694 | 0.465503547  | 0.000000000  | C       | 0.000000000  | 0.000000000  | 0.000000000  |
| C       | -1.111517788 | -0.916164291 | 0.000000000  | C       | 0.000000000  | 0.662034000  | 1.330054000  |
| C       | 0.001236476  | 0.002205187  | 0.000000000  | C       | 0.000000000  | -0.662034000 | 1.330054000  |
| C       | 1.113301295  | 0.916118332  | 0.000000000  | C       | -0.662034000 | 0.000000000  | -1.330054000 |
| C       | 1.545744123  | -0.467206799 | 0.000000000  | C       | 0.662034000  | 0.000000000  | -1.330054000 |
| H       | 1.874306472  | -0.946005802 | -0.919418990 | H       | 0.000000000  | 1.560710000  | 1.927681000  |
| H       | 1.874306472  | -0.946005802 | 0.919418990  | H       | 0.000000000  | -1.560710000 | 1.927681000  |
| H       | -1.878154797 | 0.943291171  | 0.919424171  | H       | -1.560710000 | 0.000000000  | -1.927681000 |
| H       | -1.878154797 | 0.943291171  | -0.919424171 | H       | 1.560710000  | 0.000000000  | -1.927681000 |
| spiro-2 |              |              |              | spiro-3 |              |              |              |
| C       | 0.000000000  | 0.772810000  | -1.122997000 | C       | 1.058484000  | -0.830035000 | -0.383540000 |
| C       | 0.000000000  | -0.772810000 | -1.123008000 | C       | -0.051275000 | -1.390634000 | 0.433504000  |
| C       | 0.000000000  | -0.000002000 | 0.129611000  | C       | -0.000006000 | -0.000005000 | 0.430910000  |
| C       | -0.630863000 | 0.000006000  | 1.521221000  | C       | 0.051282000  | 1.390624000  | 0.433496000  |
| C       | 0.630863000  | 0.000002000  | 1.521222000  | C       | -1.058483000 | 0.830036000  | -0.383549000 |
| H       | 0.916542000  | -1.282713000 | -1.392977000 | H       | -0.992647000 | 0.713468000  | -1.462267000 |
| H       | -0.916542000 | 1.282710000  | -1.392973000 | H       | -2.060628000 | 0.842751000  | 0.039498000  |
| H       | 0.916541000  | 1.282710000  | -1.392973000 | H       | 2.060633000  | -0.842737000 | 0.039497000  |
| H       | -0.916541000 | -1.282713000 | -1.392977000 | H       | 0.992642000  | -0.713469000 | -1.462259000 |
| spiro-4 |              |              |              |         |              |              |              |
| C       | 0.468583000  | 1.435715000  | 0.000003000  |         |              |              |              |
| C       | -1.065840000 | 1.069288000  | 0.000000000  |         |              |              |              |
| C       | 0.017646000  | 0.077939000  | 0.000001000  |         |              |              |              |
| C       | 0.458026000  | -1.223288000 | 0.645956000  |         |              |              |              |
| C       | 0.458024000  | -1.223288000 | -0.645955000 |         |              |              |              |
| H       | 0.583969000  | -1.684856000 | -1.607789000 |         |              |              |              |
| H       | -1.600776000 | 1.314885000  | 0.912940000  |         |              |              |              |
| H       | 0.583974000  | -1.684858000 | 1.607788000  |         |              |              |              |
| H       | -1.600772000 | 1.314883000  | -0.912943000 |         |              |              |              |

Table S2: Optimized geometries of the C<sub>5</sub>H<sub>4</sub> isomers in triplet ground electronic state and quintet electronic state for **ptC-1** in Cartesian coordinates (in Angstrom units) obtained at B3LYP/6-311+G(d,p) level of theory.

|                |              |              |              |                              |              |              |              |
|----------------|--------------|--------------|--------------|------------------------------|--------------|--------------|--------------|
| <b>py-1</b>    |              |              |              | <b>py-2</b>                  |              |              |              |
| C              | 0.000000000  | 0.000000000  | 0.855123000  | C                            | -0.856875000 | -1.046206000 | 0.000000000  |
| C              | 0.000000000  | 1.100891000  | -0.235013000 | C                            | -0.135923000 | -0.165956000 | 1.003958000  |
| C              | -1.100891000 | 0.000000000  | -0.235013000 | C                            | -0.135923000 | -0.165956000 | -1.003958000 |
| C              | 0.000000000  | -1.100891000 | -0.235013000 | C                            | -0.135923000 | 0.988980000  | 0.000000000  |
| C              | 1.100891000  | 0.000000000  | -0.235013000 | C                            | 0.996443000  | 0.061606000  | 0.000000000  |
| H              | 0.000000000  | 2.117265000  | 0.127394000  | H                            | 2.074730000  | 0.116628000  | 0.000000000  |
| H              | -2.117265000 | 0.000000000  | 0.127394000  | H                            | -0.085293000 | -0.104158000 | -2.081224000 |
| H              | 0.000000000  | -2.117265000 | 0.127394000  | H                            | -0.294940000 | 2.056879000  | 0.000000000  |
| H              | 2.117265000  | 0.000000000  | 0.127394000  | H                            | -0.085293000 | -0.104158000 | 2.081224000  |
| <b>ptC-1</b>   |              |              |              | <b>ptC-2</b>                 |              |              |              |
| C              | 1.305853000  | 0.687489000  | 0.050490000  | C                            | 0.000000000  | 0.647220000  | 1.607238000  |
| C              | 1.305853000  | -0.687489000 | 0.050490000  | C                            | 0.000000000  | -0.647220000 | 1.607238000  |
| C              | 0.000000000  | 0.000000000  | 0.195312000  | C                            | 0.000000000  | 0.000000000  | 0.092284000  |
| C              | -1.305853000 | 0.687489000  | 0.050490000  | C                            | 0.000000000  | 0.764571000  | -1.165173000 |
| C              | -1.305853000 | -0.687489000 | 0.050490000  | C                            | 0.000000000  | -0.764571000 | -1.165173000 |
| H              | -1.545152000 | 1.529971000  | -0.595910000 | H                            | -0.914591000 | -1.277921000 | -1.464618000 |
| H              | -1.545152000 | -1.529971000 | -0.595910000 | H                            | 0.914591000  | -1.277921000 | -1.464618000 |
| H              | 1.545152000  | 1.529971000  | -0.595910000 | H                            | 0.914591000  | 1.277921000  | -1.464618000 |
| H              | 1.545152000  | -1.529971000 | -0.595910000 | H                            | -0.914591000 | 1.277921000  | -1.464618000 |
| <b>ptC-3</b>   |              |              |              | <b>spiro-1</b>               |              |              |              |
| C              | 0.000000000  | 2.612392000  | 0.000000000  | C                            | 0.000000000  | 0.656823000  | 1.328726000  |
| C              | 0.000190000  | 1.280911000  | 0.000000000  | C                            | 0.000000000  | -0.656823000 | 1.328726000  |
| C              | 0.000000000  | 0.000000000  | 0.000000000  | C                            | 0.000000000  | 0.000000000  | 0.000000000  |
| C              | -0.000190000 | -1.280911000 | 0.000000000  | C                            | 0.656823000  | 0.000000000  | -1.328726000 |
| C              | 0.000000000  | -2.612392000 | 0.000000000  | C                            | -0.656823000 | 0.000000000  | -1.328726000 |
| H              | -0.001387000 | -3.181842000 | 0.926998000  | H                            | 1.554201000  | 0.000000000  | -1.931125000 |
| H              | -0.001387000 | -3.181842000 | -0.926998000 | H                            | -1.554201000 | 0.000000000  | -1.931125000 |
| H              | 0.001387000  | 3.181842000  | -0.926998000 | H                            | 0.000000000  | -1.554201000 | 1.931125000  |
| H              | 0.001387000  | 3.181842000  | 0.926998000  | H                            | 0.000000000  | 1.554201000  | 1.931125000  |
| <b>spiro-2</b> |              |              |              | <b>spiro-3</b>               |              |              |              |
| C              | 0.000000000  | 0.778720000  | -1.115910000 | C                            | 1.509330000  | -1.240533000 | -0.258740000 |
| C              | 0.000000000  | -0.778720000 | -1.115910000 | C                            | 0.122093000  | -1.321370000 | -0.167665000 |
| C              | 0.000000000  | 0.000000000  | 0.128735000  | C                            | 0.000000000  | 0.000000000  | -0.258740000 |
| C              | -0.649890000 | 0.000000000  | 1.526417000  | C                            | -0.122093000 | 1.321370000  | -0.167665000 |
| C              | 0.649890000  | 0.000000000  | 1.526417000  | C                            | -1.509330000 | 1.240533000  | -0.258740000 |
| H              | 0.912693000  | -1.280751000 | -1.424623000 | H                            | -1.989290000 | 1.392116000  | -1.225354000 |
| H              | -0.912693000 | 1.280751000  | -1.424623000 | H                            | -2.142478000 | 1.129390000  | 0.622775000  |
| H              | 0.912693000  | 1.280751000  | -1.424623000 | H                            | 2.142478000  | -1.129390000 | 0.622775000  |
| H              | -0.912693000 | -1.280751000 | -1.424623000 | H                            | 1.989290000  | -1.392116000 | -1.225354000 |
| <b>spiro-4</b> |              |              |              | <b>ptC-1 (quintet state)</b> |              |              |              |
| C              | 0.402742000  | 1.452771000  | 0.000000000  | C                            | 1.217274000  | 0.701947000  | -0.032499000 |
| C              | -1.029778000 | 1.155894000  | 0.000000000  | C                            | 1.217274000  | -0.701947000 | -0.032499000 |
| C              | 0.170355000  | 0.053751000  | 0.000000000  | C                            | 0.000000000  | 0.000000000  | 0.661047000  |
| C              | 0.402742000  | -1.239088000 | 0.655544000  | C                            | -1.217274000 | 0.701947000  | -0.032499000 |
| C              | 0.402742000  | -1.239088000 | -0.655544000 | C                            | -1.217274000 | -0.701947000 | -0.032499000 |
| H              | 0.570690000  | -1.777828000 | -1.575134000 | H                            | -1.198875000 | 1.474159000  | -0.796629000 |
| H              | -1.617095000 | 1.225109000  | 0.917834000  | H                            | -1.198875000 | -1.474159000 | -0.796629000 |
| H              | 0.570690000  | -1.777828000 | 1.575134000  | H                            | 1.198875000  | 1.474159000  | -0.796629000 |
| H              | -1.617095000 | 1.225109000  | -0.917834000 | H                            | 1.198875000  | -1.474159000 | -0.796629000 |

Table S3: Dipole moments in different axis (in Debye), total dipole moment ( $|\mu|$  in Debye), Centrifugal distortion constants, and rotational constants (in MHz) of C<sub>5</sub>H<sub>4</sub> isomers in their ground electronic states calculated at the CCSD(T)/cc-pVTZ level of theory.

| Isomer                | $\mu_a$ | $\mu_b$ | $\mu_c$ | $ \mu $ | $D_J$                 | $D_K$                  | $D_{JK}$               | $d_1$                  | $d_2$                  | $A_e$     | $B_e$    | $C_e$   |
|-----------------------|---------|---------|---------|---------|-----------------------|------------------------|------------------------|------------------------|------------------------|-----------|----------|---------|
| <b>Pent-1,2-diyne</b> | 0.00    | 0.00    | 1.36    | 1.36    | ---                   | ---                    | ---                    | ---                    | ---                    | 159960.54 | 2014.97  | 2014.97 |
| <b>py-1</b>           | 0.00    | 0.01    | 1.82    | 1.83    | $5.20 \times 10^{-3}$ | $3.27 \times 10^{-3}$  | $-4.72 \times 10^{-3}$ | $6.92 \times 10^{-4}$  | $1.42 \times 10^{-3}$  | 10013.43  | 10013.39 | 7401.87 |
| <b>py-2</b>           | 3.93    | 0.44    | 1.21    | 4.26    | $3.98 \times 10^{-3}$ | $1.84 \times 10^{-3}$  | $-2.80 \times 10^{-3}$ | $-6.43 \times 10^{-4}$ | $6.53 \times 10^{-4}$  | 10020.89  | 9977.03  | 7546.34 |
| <b>ptc-1</b>          | 0.02    | 0.01    | 0.28    | 0.57    | $6.28 \times 10^{-4}$ | $-2.47 \times 10^{-2}$ | $3.47 \times 10^{-2}$  | $-1.61 \times 10^{-4}$ | $-2.45 \times 10^{-5}$ | 16165.57  | 4673.34  | 3626.16 |
| <b>ptc-2</b>          | 4.64    | 0.00    | 0.00    | 4.64    | $1.12 \times 10^{-3}$ | $5.70 \times 10^{-3}$  | $1.53 \times 10^{-3}$  | $-2.11 \times 10^{-4}$ | $9.83 \times 10^{-5}$  | 14763.42  | 5191.84  | 4048.62 |
| <b>ptc-3</b>          | 0.00    | 0.00    | 0.00    | 0.00    | $2.53 \times 10^{-4}$ | $2.21 \times 10^{-4}$  | $3.22 \times 10^{-2}$  | $-3.01 \times 10^{-5}$ | $1.82 \times 10^{-4}$  | 15768.47  | 3909.69  | 4856.63 |
| <b>spiro-1</b>        | 0.00    | 0.00    | 0.00    | 0.00    | ---                   | ---                    | ---                    | ---                    | ---                    | 16366.78  | 4378.85  | 4378.85 |
| <b>spiro-2</b>        | 3.40    | 0.00    | 0.00    | 3.40    | ---                   | ---                    | ---                    | ---                    | ---                    | 14895.47  | 4750.50  | 4416.97 |
| <b>spiro-3</b>        | 0.00    | 0.00    | 2.46    | 2.61    | ---                   | ---                    | ---                    | ---                    | ---                    | 13353.51  | 5379.75  | 4907.22 |
| <b>spiro-4</b>        | 2.59    | 2.09    | 0.00    | 3.57    | ---                   | ---                    | ---                    | ---                    | ---                    | 14705.66  | 4582.37  | 4560.19 |

Table S4: The energy gap between singlet and triplet spin state ( $\Delta E_{st}$  in kcal mol<sup>-1</sup>), number of imaginary frequencies (NImag), and dipole moment ( $|\mu|$  in Debye) of all nine isomers of C<sub>5</sub>H<sub>4</sub> at B3LYP/6-311+G(d,p) level of theory.

| Molecules | $\Delta E_{st}$ | NImag | $ \mu $ |
|-----------|-----------------|-------|---------|
| py-1      | 111.71          | 3     | 1.81    |
| Py-2      | 36.07           | 0     | 2.64    |
| ptC-1     | 1.79            | 2     | 2.59    |
| ptC-2     | 57.16           | 3     | 2.2     |
| ptC-3     | -110.56         | 0     | 0       |
| spiro-1   | 59.64           | 2     | 1.58    |
| spiro-2   | 15.39           | 0     | 1.84    |
| spiro-3   | -88.68          | 0     | 0       |
| spiro-4   | 9.41            | 0     | 3.06    |

Table S5: The energy gap between singlet and triplet spin state ( $\Delta E_{st}$  in kcal mol<sup>-1</sup>), number of imaginary frequencies (NImag), and dipole moment ( $|\mu|$  in Debye) of all nine isomers of C<sub>5</sub>H<sub>4</sub> at  $\omega$ B97XD/6-311+G(d,p) level of theory.

| Molecules | $\Delta E_{st}$ | NImag | $ \mu $ |
|-----------|-----------------|-------|---------|
| py-1      | 147.78          | 2     | 2.79    |
| Py-2      | 36.87           | 0     | 2.18    |
| ptC-1     | 1.51            | 2     | 0.00    |
| ptC-2     | 60.69           | 3     | 7.38    |
| ptC-3     | -4.40           | 2     | 2.53    |
| spiro-1   | 61.54           | 2     | 1.73    |
| spiro-2   | 15.01           | 0     | 1.75    |
| spiro-3   | 17.89           | 1     | 1.09    |
| spiro-4   | 10.03           | 0     | 2.99    |

Table S6: Electron density descriptors (in a.u.) at the (3, −1) bond critical points (BCP) obtained from the B3LYP/6-311+G(d,p) level for all the nine isomers. The topological parameters such as Hamiltonian Kinetic Energy  $K(r_c)$ ,  $\rho(r_c)$ , Laplacian Electron Density ( $\nabla^2\rho(r_c)$ ), Lagrangian Kinetic Energy  $G(r_c)$ , Potential Energy Density  $V(r_c)$ , Energy Density  $E(r_c)$  or  $H(r_c)$ , ELF,  $G(r_c)/V(r_c)$ , and  $G(r_c)/\rho(r_c)$  at the critical points are also given.

| Molecules | BCP        | Index | $K(r_c)$ | $\rho(r_c)$ | $(\nabla^2\rho(r_c))$ | $G(r_c)$ | $V(r_c)$ | $H(r_c)$ | ELF  | $G(r_c)/V(r_c)$ | $G(r_c)/\rho(r_c)$ |
|-----------|------------|-------|----------|-------------|-----------------------|----------|----------|----------|------|-----------------|--------------------|
| py-1      | 8(H)--4(C) | 10    | 0.284    | 0.285       | -1.000                | 0.034    | -0.318   | -0.284   | 0.99 | -0.107          | 0.120              |
|           | 4(C)--1(C) | 11    | 0.104    | 0.169       | -0.016                | 0.100    | -0.205   | -0.104   | 0.69 | -0.490          | 0.594              |
|           | 4(C)--3(C) | 12    | 0.251    | 0.271       | -0.614                | 0.097    | -0.348   | -0.251   | 0.92 | -0.280          | 0.359              |
| py-2      | 9(H)--2(C) | 10    | 0.281    | 0.283       | -0.988                | 0.034    | -0.315   | -0.281   | 0.99 | -0.108          | 0.121              |
|           | 2(C)--4(C) | 11    | 0.218    | 0.252       | -0.499                | 0.093    | -0.311   | -0.218   | 0.91 | -0.300          | 0.370              |
|           | 2(C)--1(C) | 12    | 0.226    | 0.252       | -0.532                | 0.093    | -0.318   | -0.226   | 0.91 | -0.291          | 0.367              |
| ptC-1     | 7(H)--5(C) | 10    | 0.250    | 0.264       | -0.856                | 0.036    | -0.286   | -0.250   | 0.99 | -0.125          | 0.135              |
|           | 5(C)--3(C) | 12    | 0.175    | 0.225       | -0.236                | 0.116    | -0.291   | -0.175   | 0.81 | -0.399          | 0.515              |
|           | 5(C)--4(C) | 14    | 0.361    | 0.325       | -0.887                | 0.139    | -0.499   | -0.361   | 0.91 | -0.278          | 0.427              |
| ptC-2     | 6(H)--5(C) | 10    | 0.277    | 0.280       | -0.956                | 0.038    | -0.315   | -0.277   | 0.99 | -0.120          | 0.135              |
|           | 2(C)--1(C) | 12    | 0.428    | 0.357       | -0.110                | 0.153    | -0.581   | -0.428   | 0.92 | -0.263          | 0.427              |
|           | 2(C)--3(C) | 13    | 0.165    | 0.230       | 0.059                 | 0.179    | -0.344   | -0.165   | 0.66 | -0.521          | 0.779              |
|           | 5(C)--3(C) | 14    | 0.181    | 0.227       | -0.352                | 0.093    | -0.275   | -0.181   | 0.87 | -0.340          | 0.412              |
|           | 5(C)--4(C) | 16    | 0.214    | 0.250       | -0.506                | 0.088    | -0.302   | -0.214   | 0.91 | -0.291          | 0.351              |
| ptC-3     | 6(H)--5(C) | 10    | 0.272    | 0.277       | -0.940                | 0.037    | -0.309   | -0.272   | 0.99 | -0.119          | 0.133              |
|           | 5(C)--4(C) | 12    | 0.274    | 0.283       | -0.687                | 0.102    | -0.377   | -0.274   | 0.92 | -0.272          | 0.362              |
|           | 4(C)--3(C) | 13    | 0.239    | 0.253       | -0.446                | 0.128    | -0.367   | -0.239   | 0.84 | -0.348          | 0.505              |
| spiro-1   | 8(H)--2(C) | 10    | 0.273    | 0.277       | -0.946                | 0.036    | -0.309   | -0.273   | 0.99 | -0.118          | 0.132              |
|           | 2(C)--3(C) | 11    | 0.201    | 0.242       | -0.368                | 0.109    | -0.310   | -0.201   | 0.86 | -0.351          | 0.449              |
|           | 2(C)--1(C) | 12    | 0.398    | 0.340       | -0.899                | 0.173    | -0.571   | -0.398   | 0.88 | -0.303          | 0.511              |
| spiro-2   | 9(H)--2(C) | 10    | 0.271    | 0.276       | -0.924                | 0.040    | -0.311   | -0.271   | 0.99 | -0.129          | 0.145              |
|           | 4(C)--5(C) | 12    | 0.591    | 0.421       | -1.457                | 0.227    | -0.818   | -0.591   | 0.90 | -0.278          | 0.540              |
|           | 2(C)--3(C) | 13    | 0.239    | 0.264       | -0.568                | 0.097    | -0.336   | -0.239   | 0.91 | -0.288          | 0.366              |
|           | 2(C)--1(C) | 15    | 0.166    | 0.220       | -0.319                | 0.086    | -0.252   | -0.166   | 0.88 | -0.342          | 0.392              |
| spiro-3   | 2(C)--1(C) | 10    | 0.235    | 0.260       | -0.523                | 0.104    | -0.339   | -0.235   | 0.90 | -0.307          | 0.400              |
|           | 2(C)--3(C) | 11    | 0.285    | 0.277       | -0.589                | 0.138    | -0.423   | -0.285   | 0.86 | -0.326          | 0.496              |
|           | 1(C)--8(H) | 12    | 0.270    | 0.277       | -0.935                | 0.036    | -0.306   | -0.270   | 0.99 | -0.119          | 0.131              |
| spiro-4   | 8(H)--4(C) | 10    | 0.281    | 0.282       | -0.991                | 0.033    | -0.314   | -0.281   | 0.99 | -0.106          | 0.118              |
|           | 4(C)--5(C) | 11    | 0.452    | 0.362       | -1.016                | 0.198    | -0.650   | -0.452   | 0.88 | -0.305          | 0.548              |
|           | 4(C)--3(C) | 13    | 0.165    | 0.218       | -0.217                | 0.110    | -0.275   | -0.165   | 0.81 | -0.401          | 0.505              |
|           | 3(C)--2(C) | 15    | 0.216    | 0.251       | -0.455                | 0.103    | -0.319   | -0.216   | 0.89 | -0.322          | 0.410              |
|           | 3(C)--1(C) | 16    | 0.294    | 0.295       | -0.732                | 0.111    | -0.405   | -0.294   | 0.92 | -0.274          | 0.376              |

Table S7: WBI Indices for all nine isomers calculated at B3LYP/6-311+G(d,p) level of theory.

| py-1  | py-2 |       | ptC-1 |       | ptC-2 |       | ptC-3 |       | spiro-1 |       | spiro-2 |       | spiro-3 |       | spiro-4 |       |      |
|-------|------|-------|-------|-------|-------|-------|-------|-------|---------|-------|---------|-------|---------|-------|---------|-------|------|
| C1-C2 | 0.70 | C1-C2 | 1.06  | C1-C2 | 1.66  | C1-C2 | 1.56  | C1-C2 | 1.12    | C1-C2 | 1.88    | C1-C2 | 0.96    | C1-C2 | 1.07    | C1-C2 | 0.97 |
| C1-C3 | 0.70 | C1-C3 | 1.06  | C1-C3 | 0.98  | C1-C3 | 1.14  | C1-C3 | 0.70    | C1-C3 | 0.97    | C1-C3 | 1.01    | C1-C3 | 0.77    | C1-C3 | 1.16 |
| C1-C4 | 0.70 | C2-C3 | 0.59  | C2-C3 | 0.98  | C2-C3 | 1.14  | C2-C3 | 1.23    | C2-C3 | 0.97    | C2-C3 | 1.01    | C2-C3 | 1.18    | C2-C3 | 1.01 |
| C1-C5 | 0.70 | C3-C4 | 0.81  | C3-C4 | 0.98  | C3-C4 | 0.86  | C3-C4 | 1.23    | C3-C4 | 0.97    | C3-C4 | 0.97    | C3-C4 | 1.18    | C3-C4 | 0.86 |
| C2-C3 | 1.10 | C3-C5 | 0.81  | C3-C5 | 0.98  | C3-C5 | 0.86  | C3-C5 | 0.70    | C3-C5 | 0.97    | C3-C5 | 0.97    | C3-C5 | 0.77    | C3-C5 | 0.86 |
| C3-C4 | 1.10 | C4-C5 | 0.83  | C4-C5 | 1.66  | C4-C5 | 1.03  | C4-C5 | 1.12    | C4-C5 | 1.88    | C4-C5 | 2.44    | C4-C5 | 1.07    | C4-C5 | 1.99 |
| C4-C5 | 1.10 | C4-H8 | 1.04  | C1-H8 | 0.88  | C4-H8 | 0.91  | C1-H8 | 0.90    | C1-H9 | 0.90    | C1-H7 | 0.90    | C1-H8 | 0.90    | C2-H7 | 0.91 |
| C5-C2 | 1.10 | C4-H9 | 1.04  | C2-H9 | 0.88  | C4-H9 | 0.91  | C1-H9 | 0.90    | C2-H8 | 0.90    | C1-H8 | 0.90    | C1-H9 | 0.90    | C2-H9 | 0.91 |
| C2-H6 | 0.91 | C5-H6 | 0.91  | C4-H6 | 0.88  | C5-H6 | 0.91  | C5-H6 | 0.90    | C4-H6 | 0.90    | C2-H6 | 0.90    | C5-H6 | 0.90    | C4-H8 | 0.90 |
| C3-H7 | 0.91 | C5-H7 | 0.91  | C5-H7 | 0.88  | C5-H7 | 0.91  | C5-H7 | 0.90    | C5-H7 | 0.90    | C2-H9 | 0.90    | C5-H7 | 0.90    | C5-H6 | 0.90 |
| C4-H8 | 0.91 | C1-C2 | 0.90  |       |       |       |       |       |         |       |         |       |         |       |         |       |      |
| C5-H9 | 0.91 | C1-C3 | 0.89  |       |       |       |       |       |         |       |         |       |         |       |         |       |      |



Figure S1: Possible 2D structure of initial guess isomers

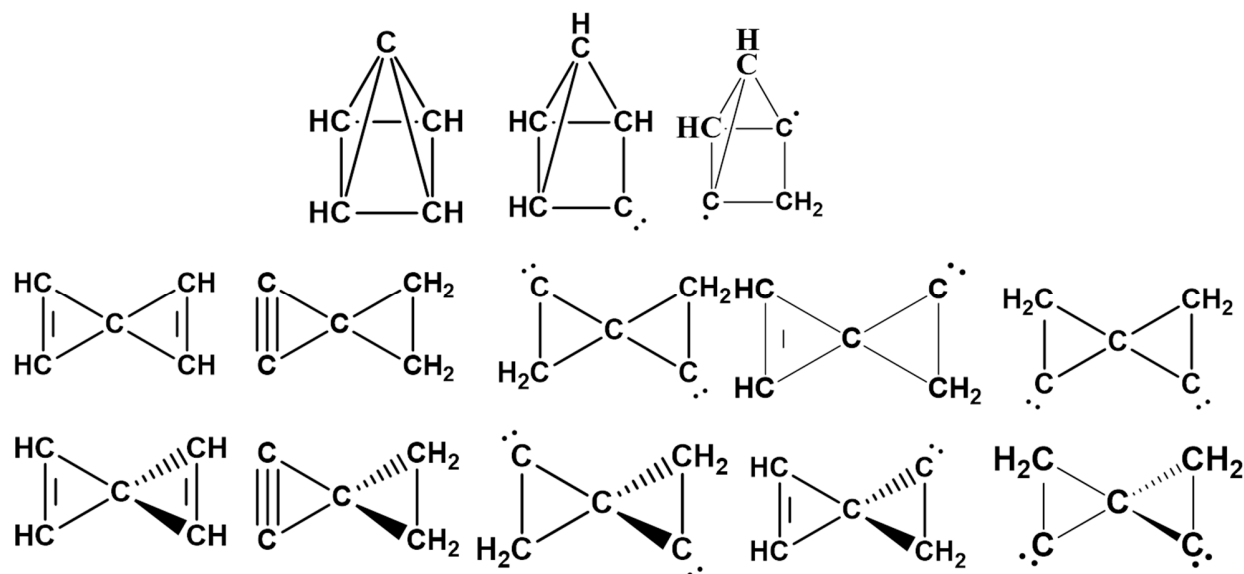

**Figure S2:** Optimized geometries of all nine isomers in their triplet spin state calculated at the B3LYP/6-311+G(d,p) level of theory.

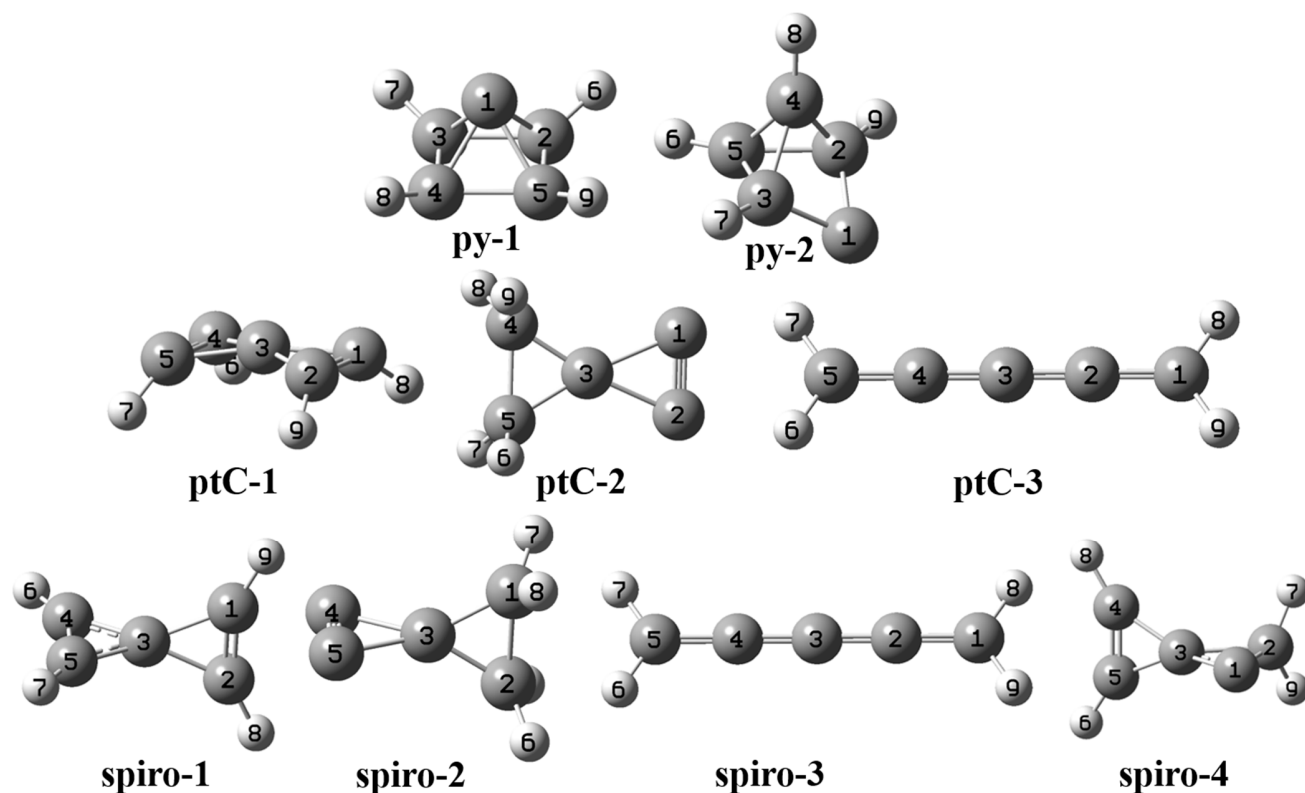

**Figure S3:** Energy profile and the structural changes of **ptC-1** with respect to the change in spin state with the ground state molecular term symbol and number of imaginary frequencies.

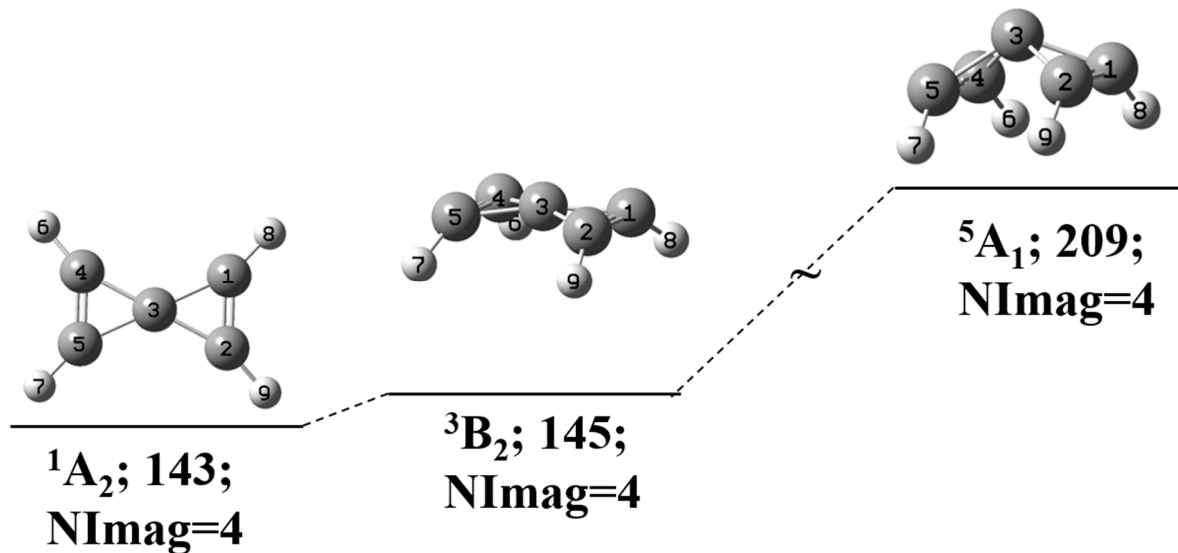

**Figure S4:** Intrinsic Reaction Coordinate (IRC) for the transition state **ptC-3** calculated at B3LYP/6-311+G(d,p) level of theory.

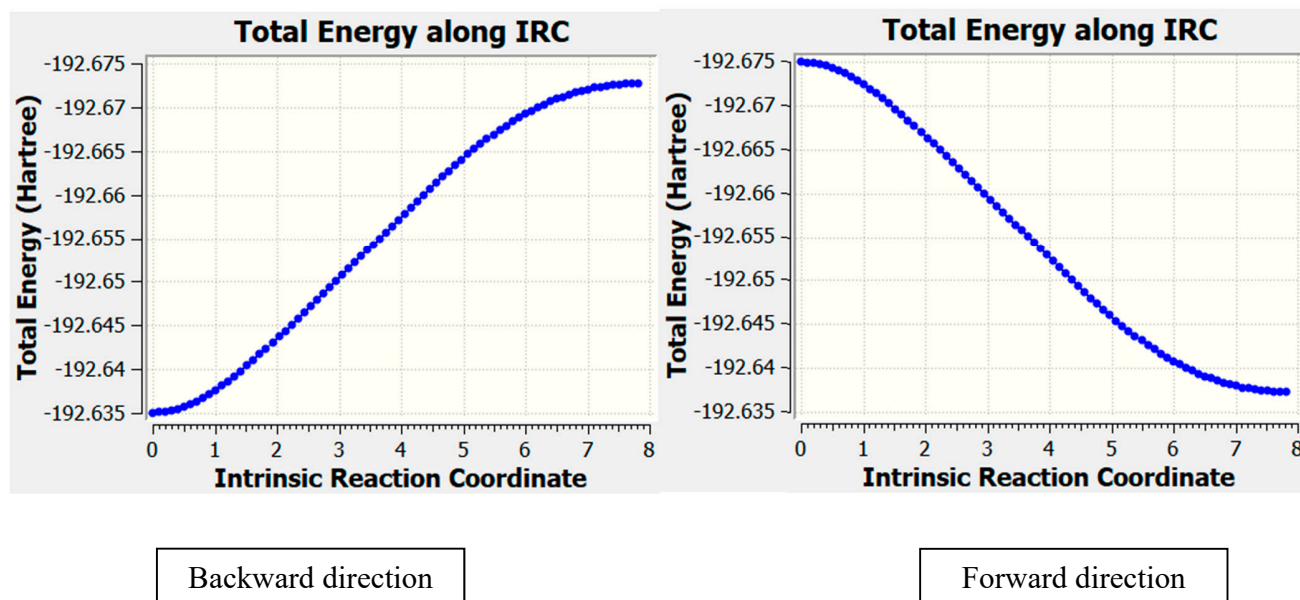

**Figure S5:** Energy evolution of isomer **py-1** ( $^1A_1$ ) of  $C_5H_4$  obtained from the AIMD simulation carried out at different temperature (10K, 60K and 120K) and 1 atm pressure for 10000 fs at the B3LYP/6-311+G(d,p) level of theory.

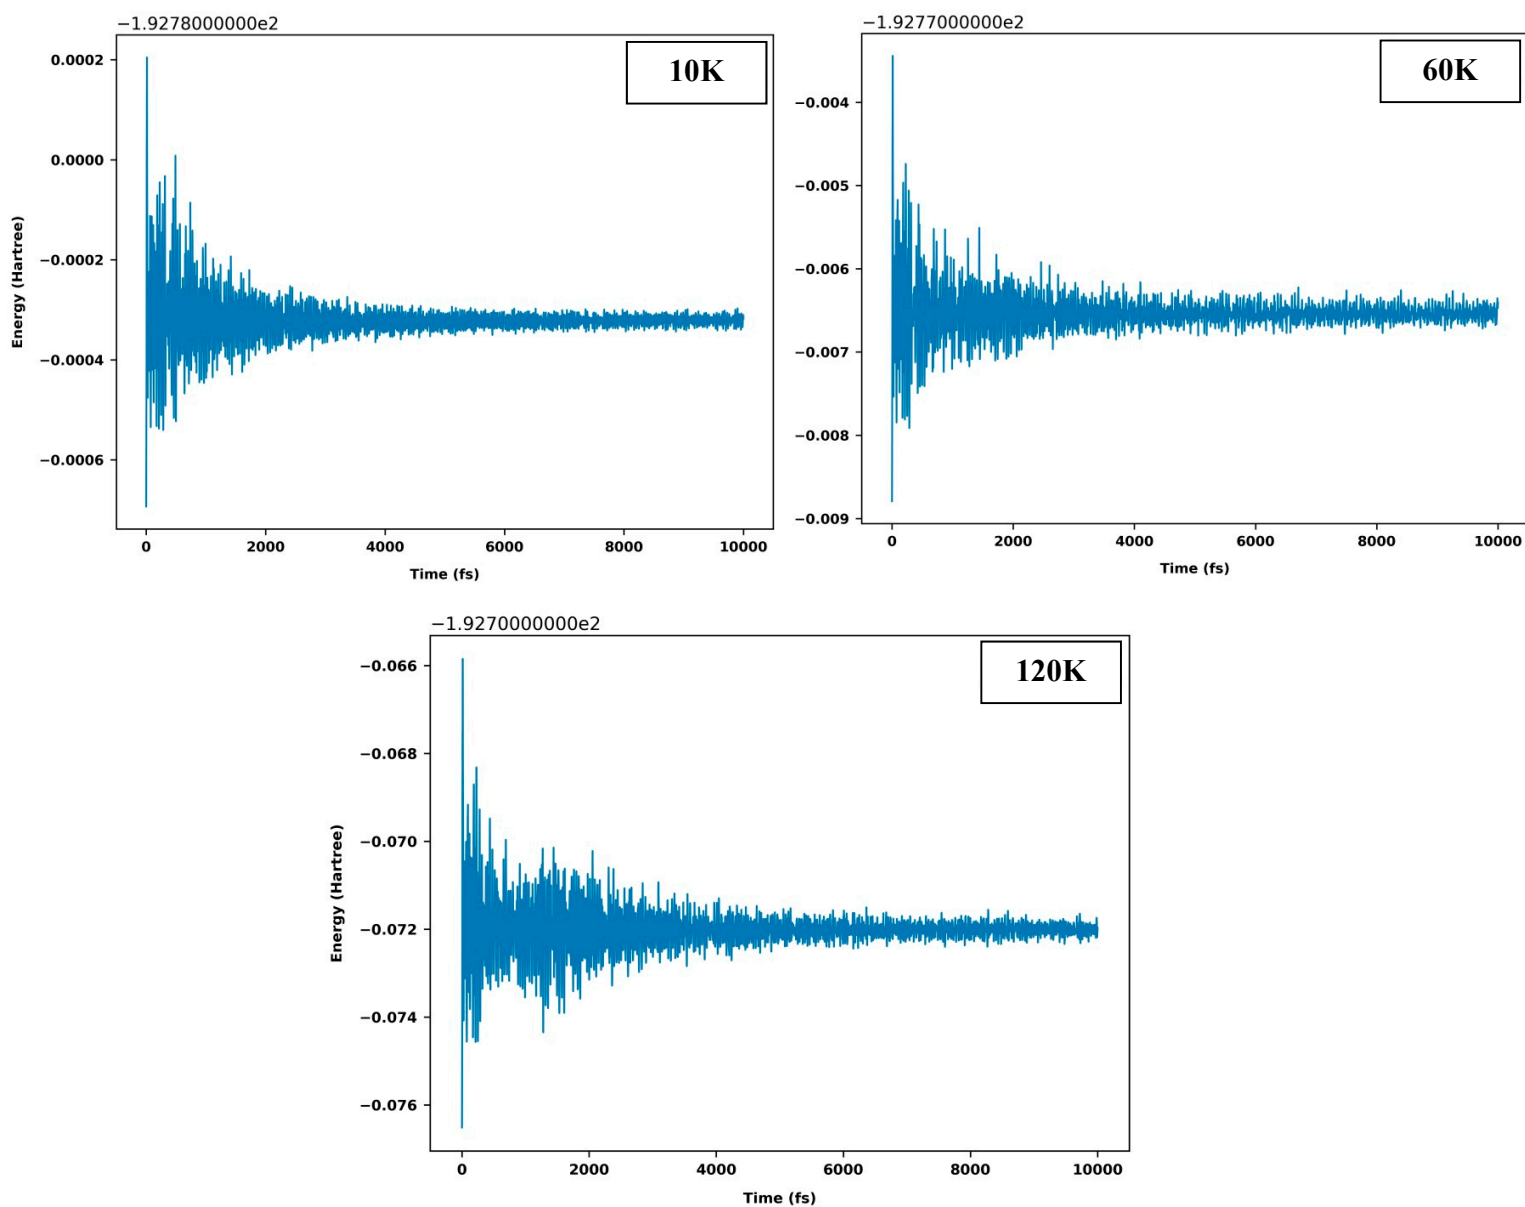

**Figure S6:** Energy evolution of isomer **py-2** ( $^1A'$ ) of  $C_5H_4$  obtained from the AIMD simulation carried out at different temperature (10K, 60K and 120K) and 1 atm pressure for 10000 fs at the B3LYP/6-311+G(d,p) level of theory.

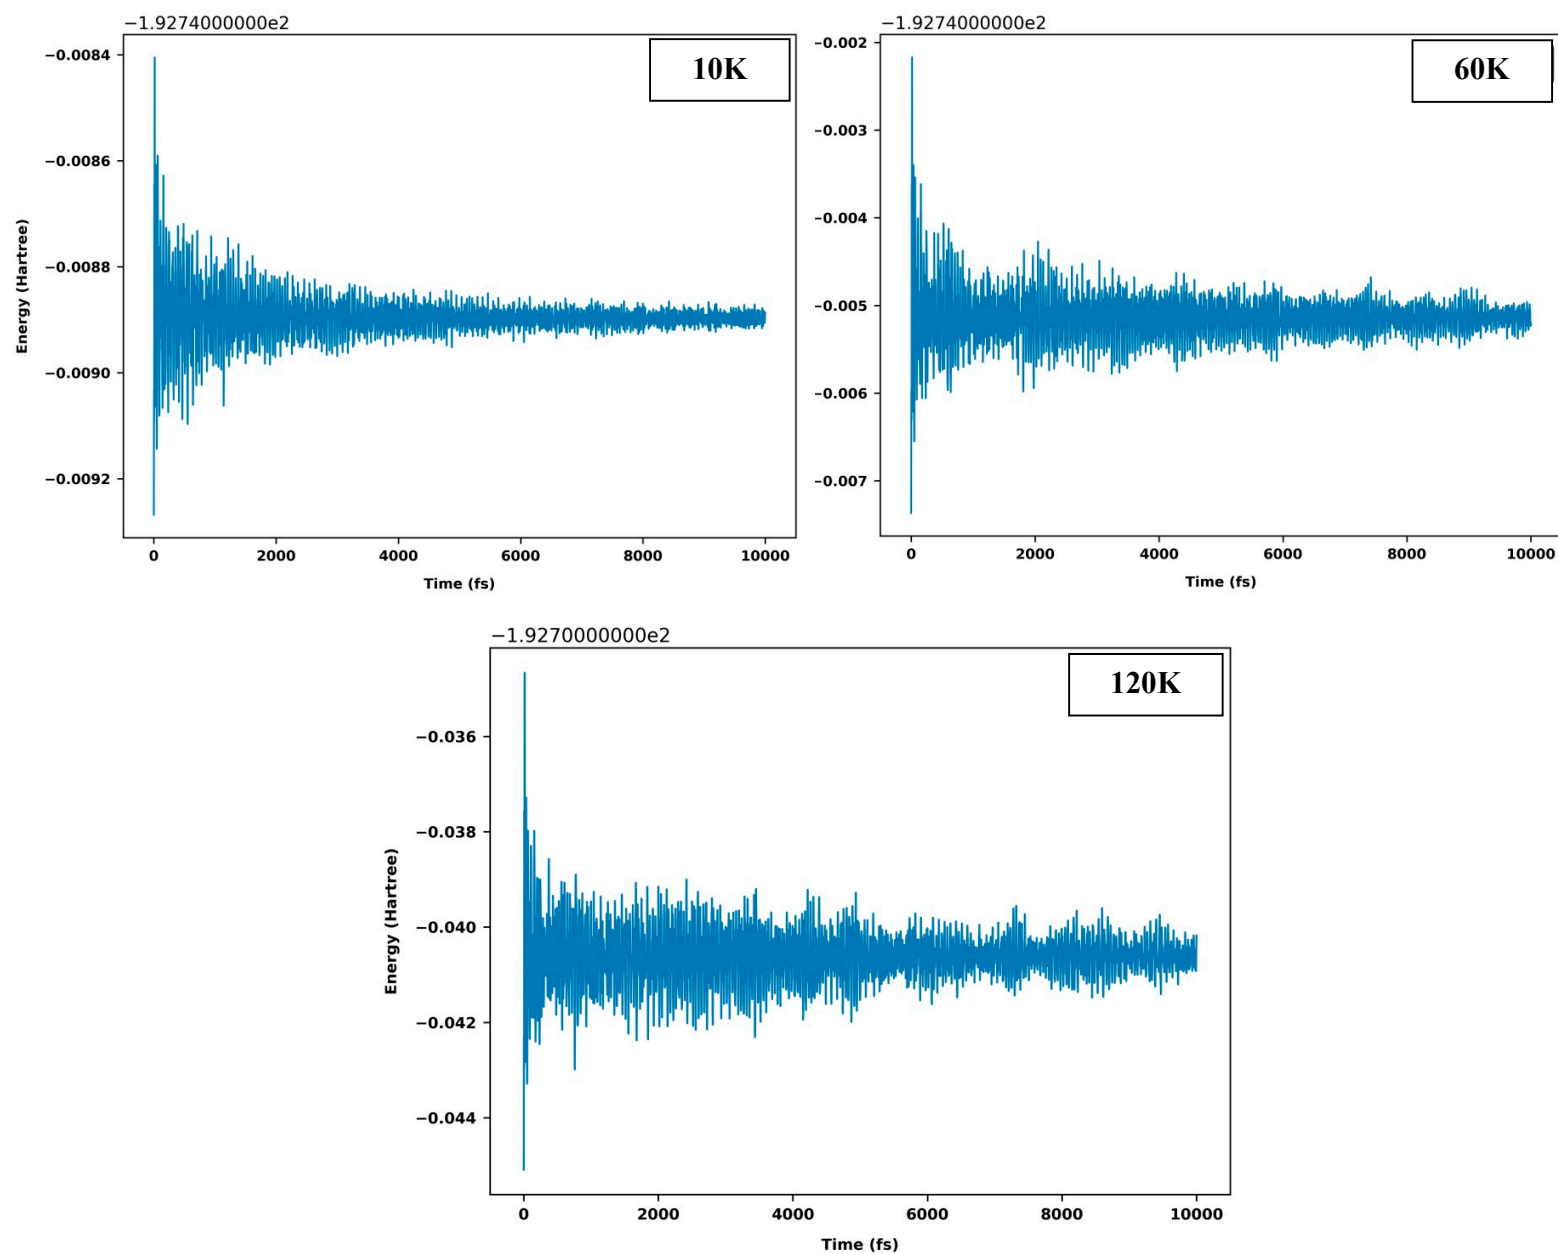

**Figure S7:** Energy evolution of isomer **spiro-1** ( $^1E$ ) of  $C_5H_4$  obtained from the AIMD simulation carried out at different temperature (10K, 60K, and 298K) and 1 atm pressure for 10000 fs at the B3LYP/6-311+G(d,p) level of theory.

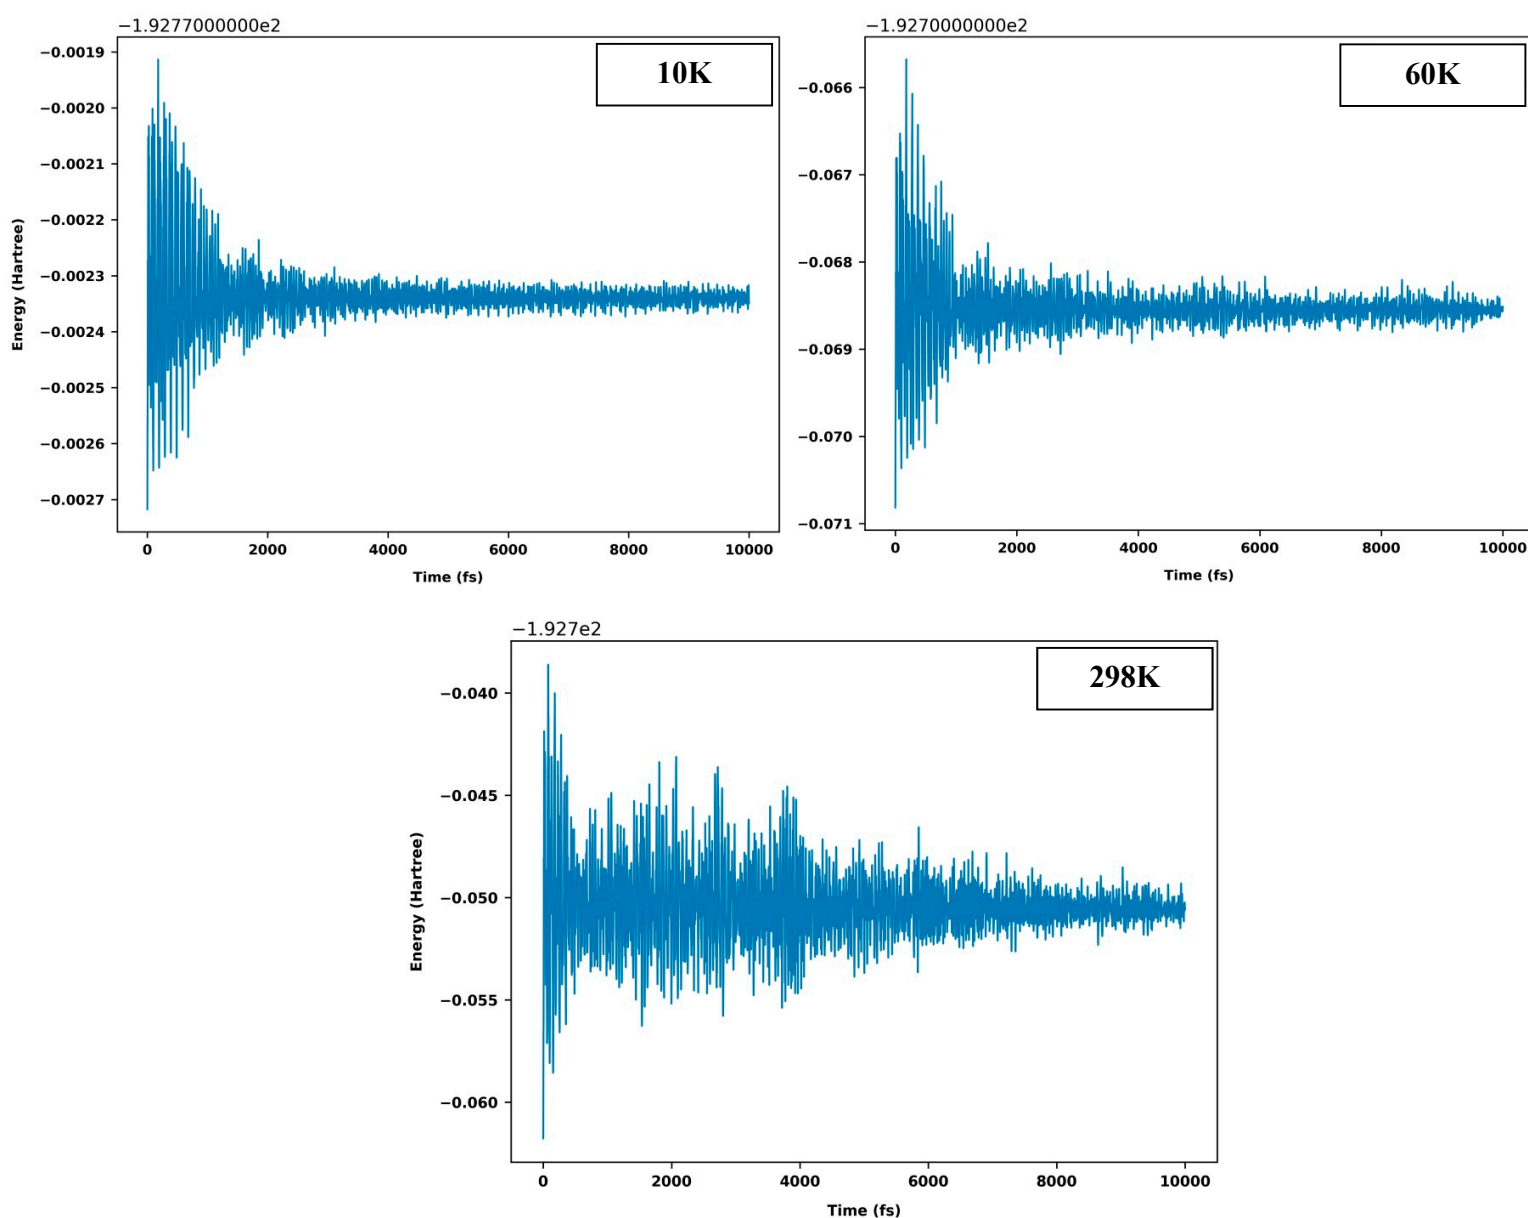

**Figure S8:** Energy evolution of isomer **spiro-3** ( $^1B$ ) of  $C_5H_4$  obtained from the AIMD simulation carried out at different temperature (10K, 60K and 120K) and 1 atm pressure for 10000 fs at the B3LYP/6-311+G(d,p) level of theory.

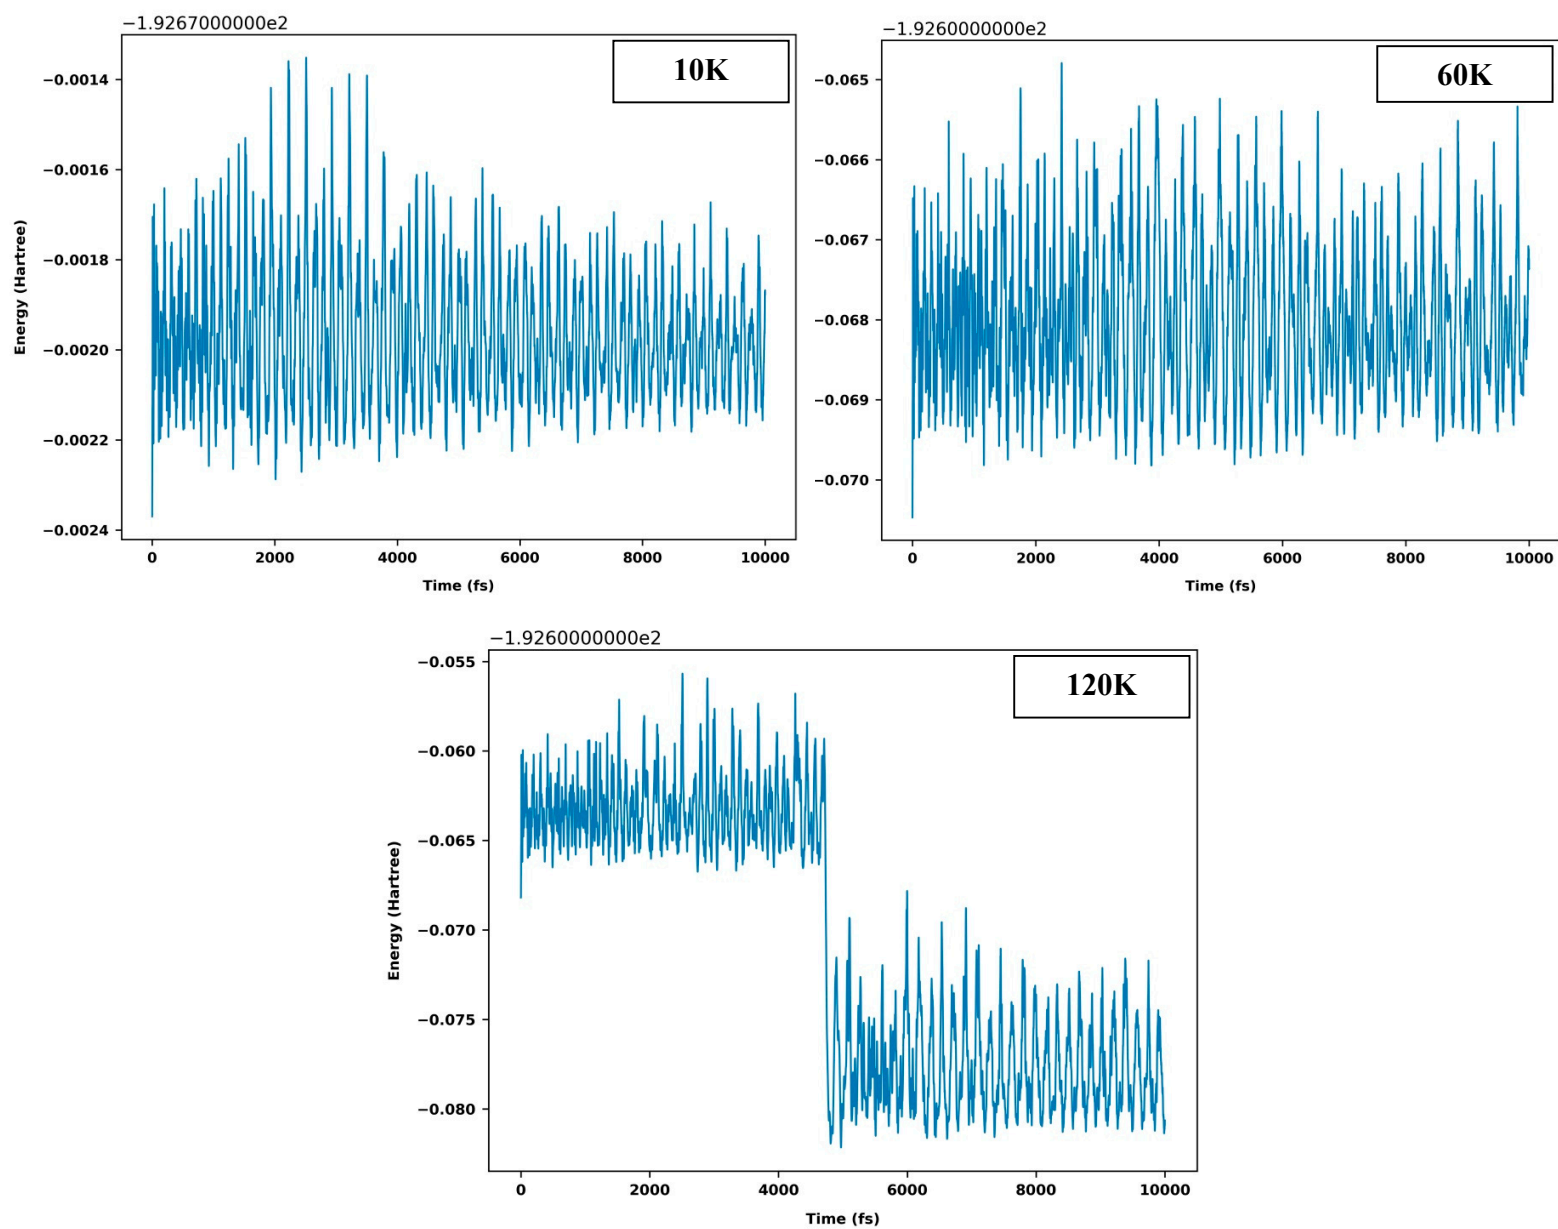

**Figure S9:** Energy evolution of isomer **spiro-4** ( $^1A'$ ) of  $C_5H_4$  obtained from the AIMD simulation carried out at different temperature (10K, 60K and 120K) and 1 atm pressure for 10000 fs at the B3LYP/6-311+G(d,p) level of theory.

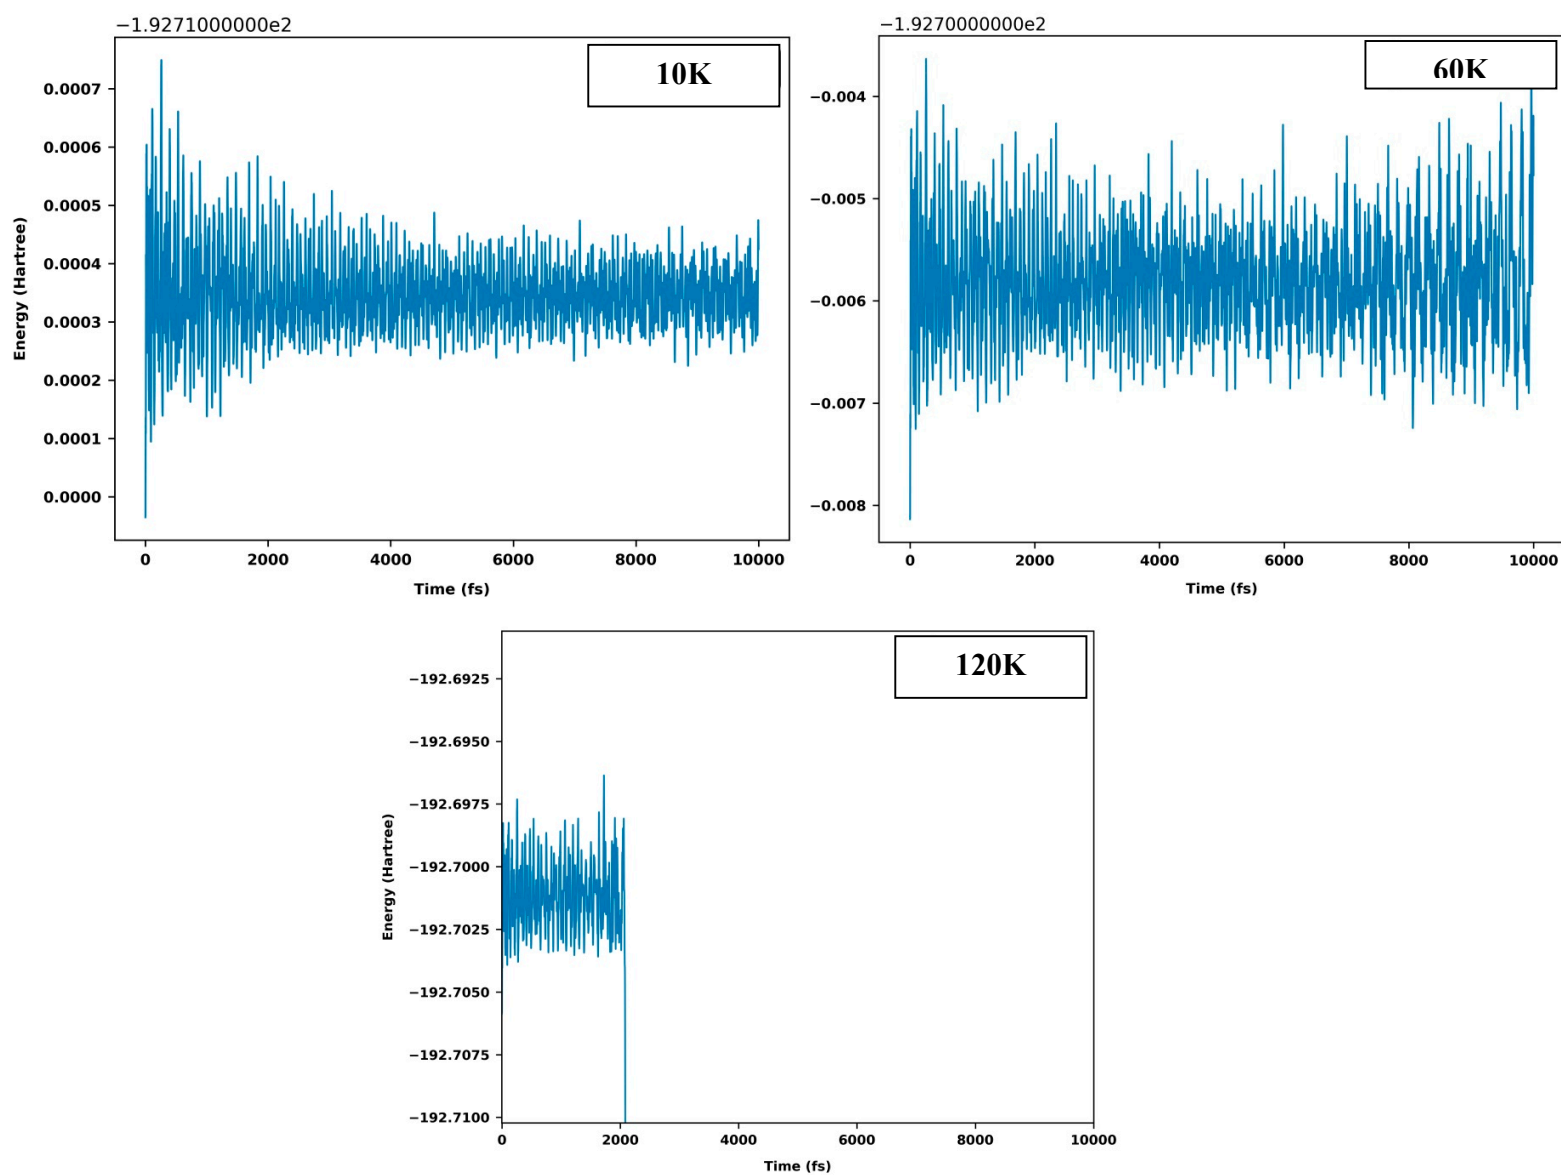

Supplement: s1 [file s1]
